# Supplementary material
Source: ML conference proceedings conference paper supplement (https://openaccess.thecvf.com/content/cvpr_2017/html/Miksik_ROAM_A_Rich_2017_CVPR_paper.html)
Supplement: Supplementary file 1 [file Miksik_ROAM_A_Rich_2017_CVPR_supplemental.pdf]

Archive with 8 entries (5 files):
- 1953-supp/
- 1953-supp/.DS_Store
- __MACOSX/
- __MACOSX/1953-supp/
- __MACOSX/1953-supp/._.DS_Store
- 1953-supp/1953-supp-video.mp4
- 1953-supp/1953-supp.pdf
- __MACOSX/1953-supp/._1953-supp.pdf
