# Supplementary material
Source: ML conference proceedings conference paper supplement (https://openaccess.thecvf.com/content/cvpr_2017/html/Miksik_ROAM_A_Rich_2017_CVPR_paper.html)
Supplement: Supplementary file 1 [file Miksik_ROAM_A_Rich_2017_CVPR_supplemental.pdf › 1953-supp/1953-supp.pdf]

# Supplementary material

## ROAM: a Rich Object Appearance Model with Application to Rotoscoping

Ondrej Miksik<sup>1\*</sup>   Juan-Manuel Pérez-Rúa<sup>2\*</sup>   Philip H. S. Torr<sup>1</sup>   Patrick Pérez<sup>2</sup>

<sup>1</sup>University of Oxford

<sup>2</sup>Technicolor Research & Innovation

### 1. Parameters and reproducibility

The relative weights of the local and global appearance are 50 and 0.002 resp.,  $\lambda = 1.0$ ,  $\mu = 0.75$ ,  $P = 9^2$ ,  $M = 20$  and other weights are set to 1. We will release the **full source code** on our website. As can be seen from our ablation study, all terms contribute to the energy and none of them dominates. Confidence intervals in Fig. 7 suggest that our model is relatively parameter agnostic. Note that our fast alternating optimization with exactly solved blocks should allow us to learn parameters in the future.

### 2. More qualitative results & videos

As part of this supplementary material, we provide the reader with results on full videos from the DAVIS [4], CPC [3], VIDEO SNAPCUT [1], and ROTO++ [2] datasets. We sample some images from these videos in Figs. 1, 2, 3. More results are provided in the supplementary video.

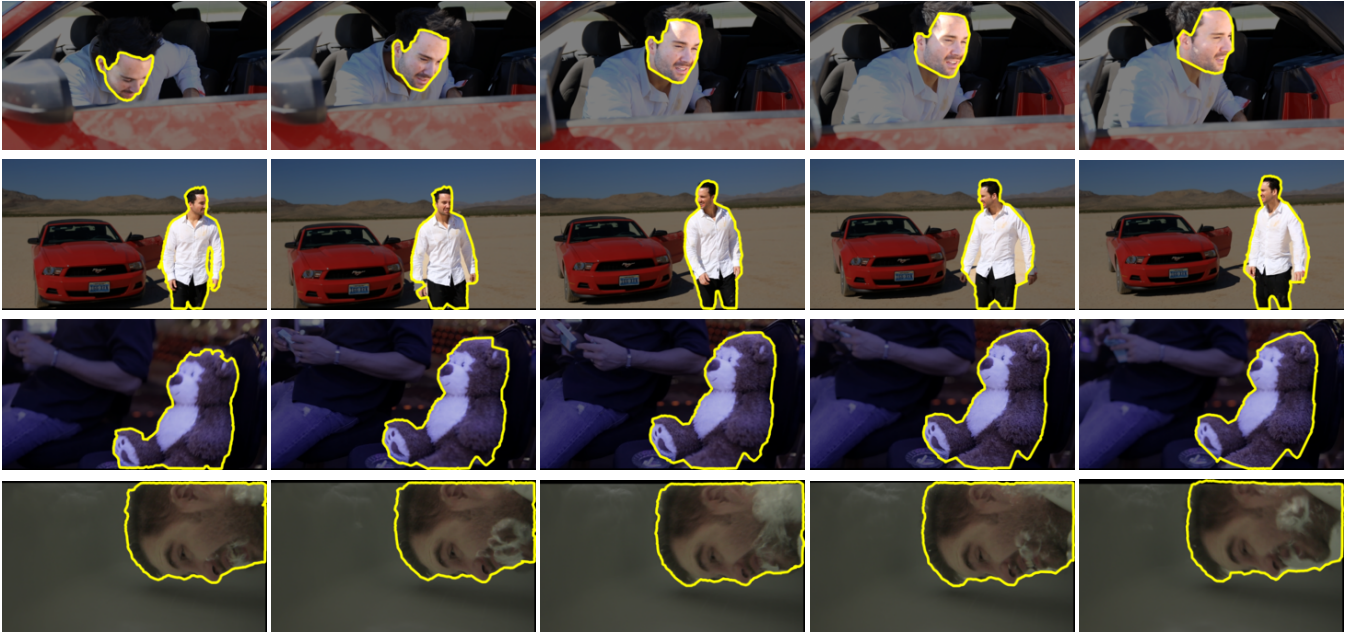

Figure 1: Qualitative results on four sequences from the ROTO++ dataset

### References

- [1] X. Bai, J. Wang, D. Simons, and G. Sapiro. Video Snapcut: Robust video object cutout using localized classifiers. *ACM TOG*, 2009. 1

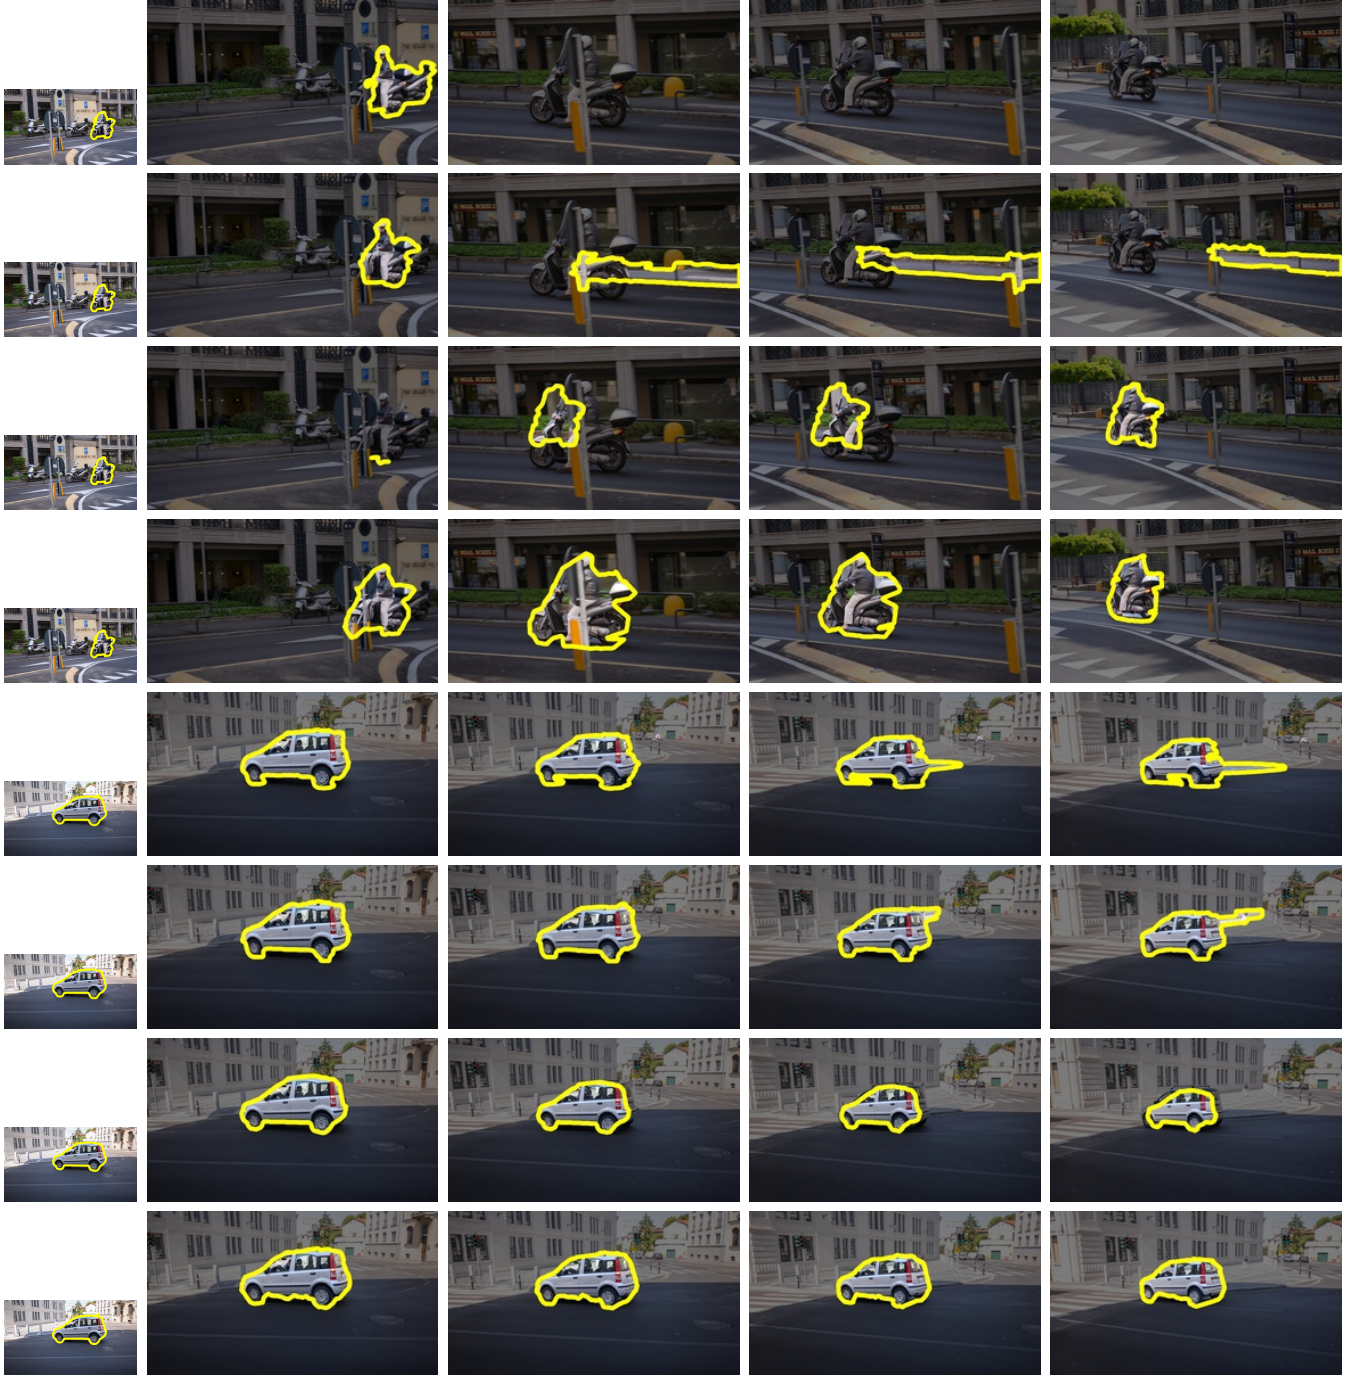

Figure 2: **More qualitative results on the DAVIS dataset:** Comparisons on *scooter-gray* and *car-shadow* sequences between (from top to bottom): JUMPCUT, ROTOBURSH, ROTO++ and ROAM.

- [2] W. Li, F. Viola, J. Starck, G. J. Brostow, and N. Campbell. Roto++: Accelerating professional rotoscoping using shape manifolds. *ACM TOG (Proc. Siggraph)*, 2016. 1
- [3] Y. Lu, X. Bai, L. Shapiro, and J. Wang. Coherent parametric contours for interactive video object segmentation. In *CVPR*, 2016. 1
- [4] F. Perazzi, J. Pont-Tuset, B. McWilliams, L. V. Gool, M. Gross, and A. Sorkine-Hornung. A benchmark dataset and evaluation methodology for video object segmentation. In *CVPR*, 2016. 1

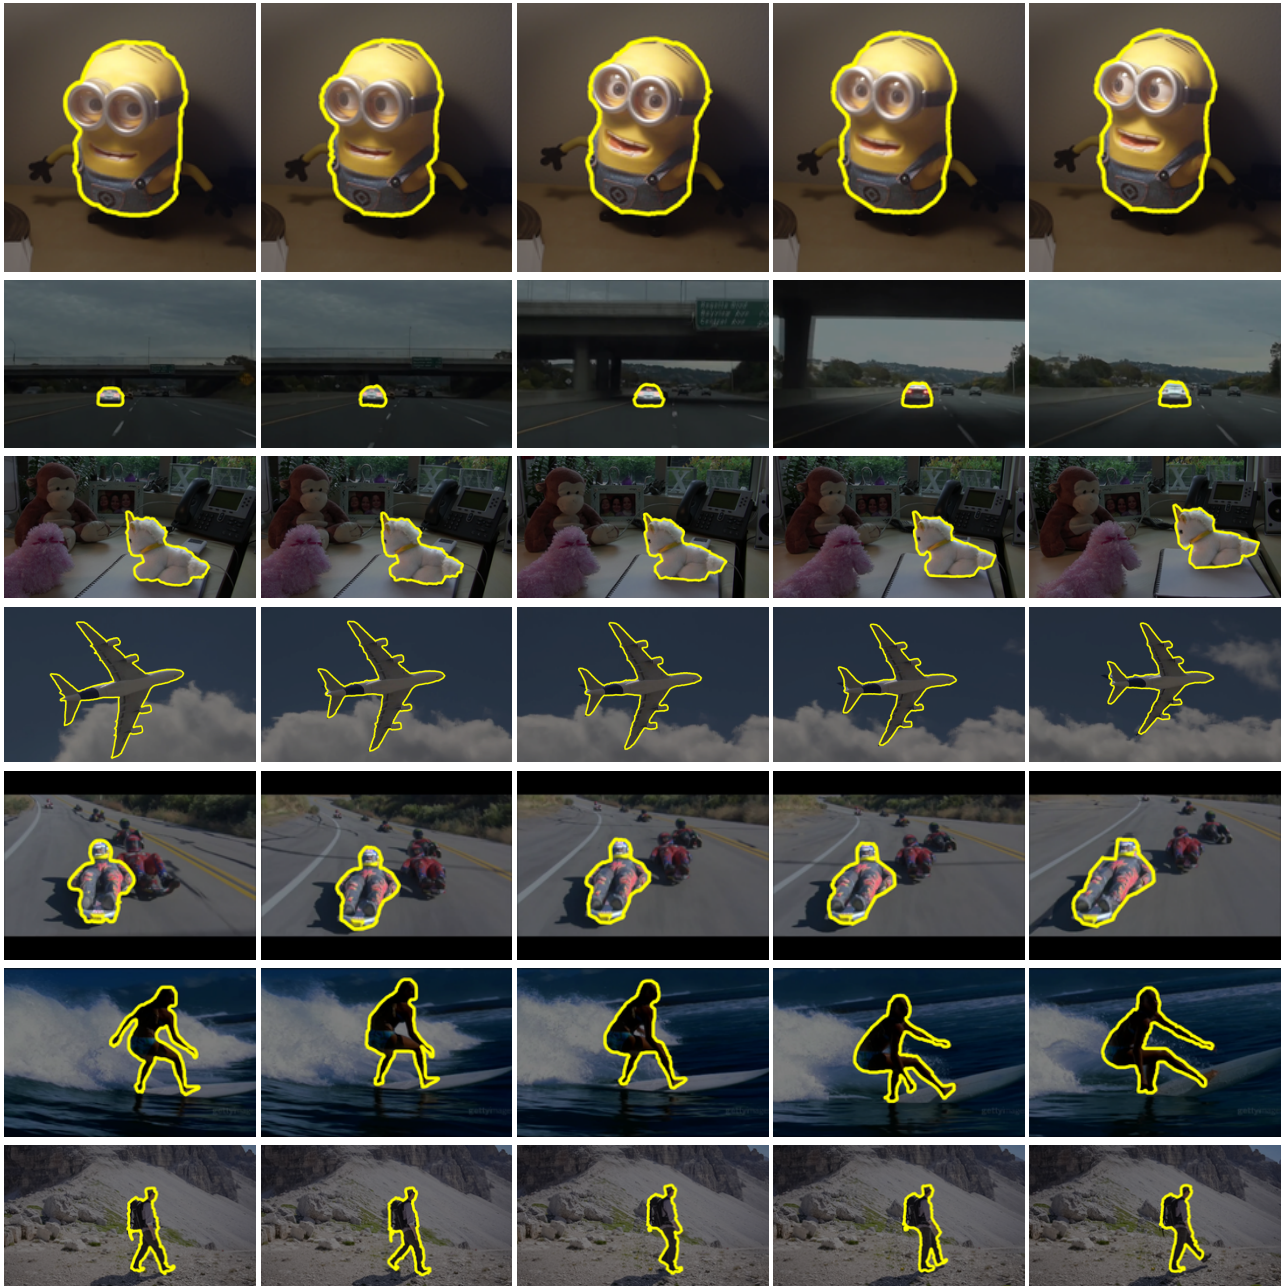

Figure 3: **More qualitative results:** Output of ROAM on very different sequences from DAVIS, CPC and VIDEO SNAP-CUT datasets among others.
